# Supplementary material for: Novel antibodies against GPIbα inhibit pulmonary metastasis by affecting vWF-GPIbα interaction
Source: J Hematol Oncol. 2018 Sep 17;11:117. doi: 10.1186/s13045-018-0659-4 (PMC6142402; doi:10.1186/s13045-018-0659-4)
Supplement: Supplementary file 3 — Table S2. Mouse (B) and human (A) GPIbα peptides fragment sequences. (XLSX 43 kb) [file 13045_2018_659_MOESM3_ESM.xlsx]

## Sheet: 工作表1
Table S2
	A					B
	Number	GL name	peptide sequence	Human		Number	GL name	peptide sequence	Mouse
	1	PS-10	PICEVSKVAS	aa 1-10		1	HS-10	VPATRTEVKD	aa 1-10
	2	SN-10	SKVASHLEVN	aa 6-15		2	SN-10	DIPDVPATRD	aa 6-15
	3	HN-10	HLEVNCDKRN	aa 11-20		3	LK-10	YDDYDDIPDS	aa 11-20
	4	CP-10	CDKRNLTALP	aa 16-25		4	CP-10	SGDTDYDDYK	aa 16-25
	5	LK-10	LTALPPDLPK	aa 21-30		5	LA-10	GCPTSSGDTY	aa 21-30
	6	PL-10	PDLPKDTTIL	aa 26-35		6	AL-10	SYPGKGCPTD	aa 26-35
	7	DN-10	DTTILHLSEN	aa 31-40		7	DN-10	NAPVYSYPGR	aa 31-40
	8	HF-10	HLSENLLYTF	aa 36-45		8	HF-10	CANLDNAPVN	aa 36-45
	9	LL-10	LLYTFSLATL	aa 41-50		9	QL-10	VASVRCANLK	aa 41-50
	10	SR-10	SLATLMPYTR	aa 46-55		10	SH-10	DTTPNVASVS	aa 46-55
	11	KV-10	KAMTSNVASV	aa 237-246		11	KV-10	TASLVHFTHQ	aa 237-246
	12	NS-10	NVASVQCDNS	aa 242-251		12	NL-10	LGTFSTASLH	aa 242-251
	13	QV-10	QCDNSDKFPV	aa 247-256		13	RV-10	LGENQLGTFD	aa 247-256
	14	DG-10	DKFPVYKYPG	aa 252-261		14	DG-10	TGILHLGENA	aa 252-261
	15	YT-10	YKYPGKGCPT	aa 257-266		15	YT-10	DLPADTGILL	aa 257-266
	16	KG-10	KGCPTLGDEG	aa 262-271		16	KT-10	TALPADLPAC	aa 262-271
	17	LY-10	LGDEGDTDLY	aa 267-276		17	SY-10	ENKKLTALPL	aa 267-276
	18	DE-10	DTDLYDYYPE	aa 272-281		18	DD-10	LEVNCENKKS	aa 272-281
	19	DG-10	DYYPEEDTEG	aa 277-286		19	DR-10	KVTSLLEVNH	aa 277-286
	20	ER-9	EDTEGDKVR	aa 282-290		20	VK-9	TCSISKVTS	aa 282-290
